# Supplementary material for: Interpenetrating gel-enabled uniform integration of metal and carbon dual matrices with nanoporous silicon for high-performance lithium storage
Source: Royal Society of Chemistry journal article supplement (doi:10.1039/d3ce01127e), 2023-12-18
Supplement: d3ce01127e1.pdf [file d3ce01127e1.pdf]

## Supplementary Information

### **Interpenetrating gel-enabled uniform integration of metal and carbon dual matrices with nanoporous silicon for high-performance lithium storage**

Ziping Zhan,<sup>a</sup> Tianyi Huang,<sup>a</sup> Junwen Zhu,<sup>a</sup> Xin Cao,<sup>a,\*</sup> Yiming Zhou,<sup>a</sup> Yawen Tang,<sup>a</sup> and Ping Wu<sup>a,\*</sup>

<sup>a</sup>Jiangsu Key Laboratory of New Power Batteries, Jiangsu Collaborative Innovation Center of Biomedical Functional Materials, School of Chemistry and Materials Science, Nanjing Normal University, Nanjing 210023, China

\*Corresponding Author: E-mail: [xincao@njnu.edu.cn](mailto:xincao@njnu.edu.cn) (X. Cao),

[zjuwuping@njnu.edu.cn](mailto:zjuwuping@njnu.edu.cn) (P. Wu)

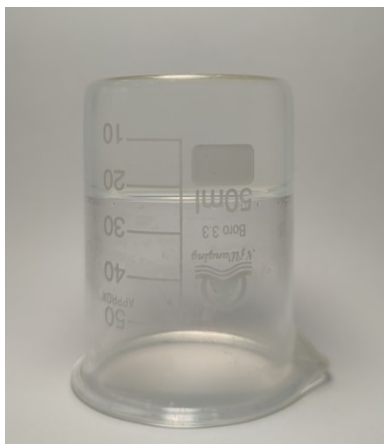

**Fig. S1** Photograph of the single SiO<sub>2</sub> hydrogel.

Synthesis of the SiO<sub>2</sub> hydrogel: 8 mL 0.01 M HCl solution was added to a mixed solution of 4 mL tetraethyl orthosilicate, 4 mL ethanol, and 8 mL water. After stirring for 2 h, 200  $\mu$ L 0.5 M hexamethylenetetramine (HMT) aqueous solution was added to the above solution, and the mixed solution was further stirred until the formation of single SiO<sub>2</sub> hydrogel.

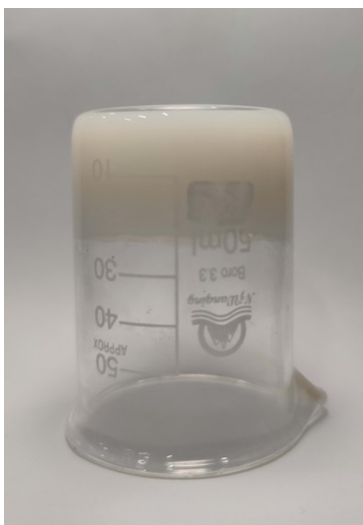

**Fig. S2** Photograph of the single In-Co cyanogel.

Synthesis of the In-Co cyanogel: Single In-Co cyanogel was obtained by mixing aqueous solutions of 0.5 M InCl<sub>3</sub> and 0.5 M K<sub>3</sub>Co(CN)<sub>6</sub> with a volume ratio of 1:1.

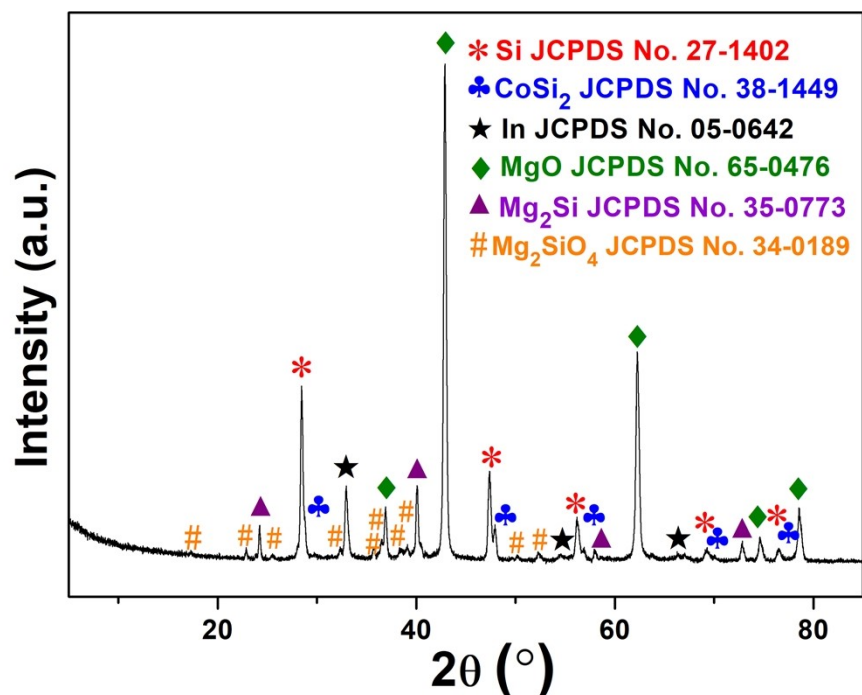

**Fig. S3** XRD pattern of the annealed product before acid etching process.

Fig. S3 shows the XRD pattern of the annealed product before acid etching. As can be seen, the crystalline phases could be well assigned to Si (JCPDS No. 27-1402),  $\text{CoSi}_2$  (JCPDS No. 38-1449), In (JCPDS No. 05-0642), MgO (JCPDS No. 65-0476),  $\text{Mg}_2\text{Si}$  (JCPDS No. 35-0773), and  $\text{Mg}_2\text{SiO}_4$  (JCPDS No. 34-0189), respectively. After subsequent acid etching process, only crystalline Si and  $\text{CoSi}_2$  components are reserved in the final nanoporous Si-Co-C material, confirming the removal of metallic In and Mg-containing byproducts.

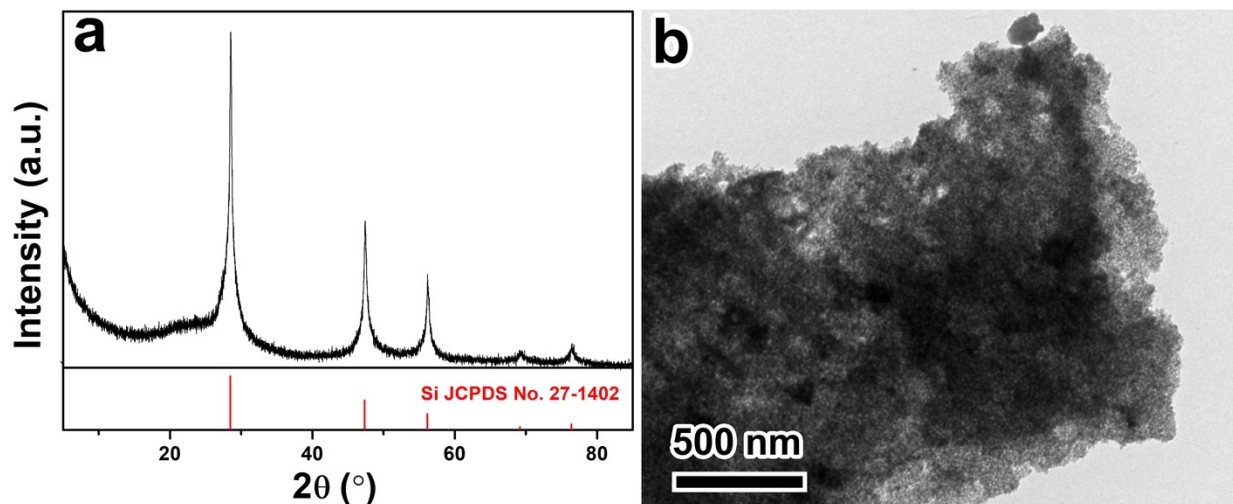

**Fig. S4** (a) XRD pattern and (b) TEM image of the single  $\text{SiO}_2$  gel-derived pure nanoporous Si material.

Synthesis of the pure nanoporous Si material: The obtained single  $\text{SiO}_2$  hydrogel (Fig. S1) was freeze-dried, and the aerogel was annealed at  $500\text{ }^\circ\text{C}$  under  $\text{N}_2$  atmosphere for 3 h. The annealed product and Mg powder were mixed with a weight ratio of 1:1, and the mixed powders were further annealed at  $650\text{ }^\circ\text{C}$  under Ar atmosphere for 4 h and subsequently washed with 1 M HCl solution, yielding the final nanoporous Si material.

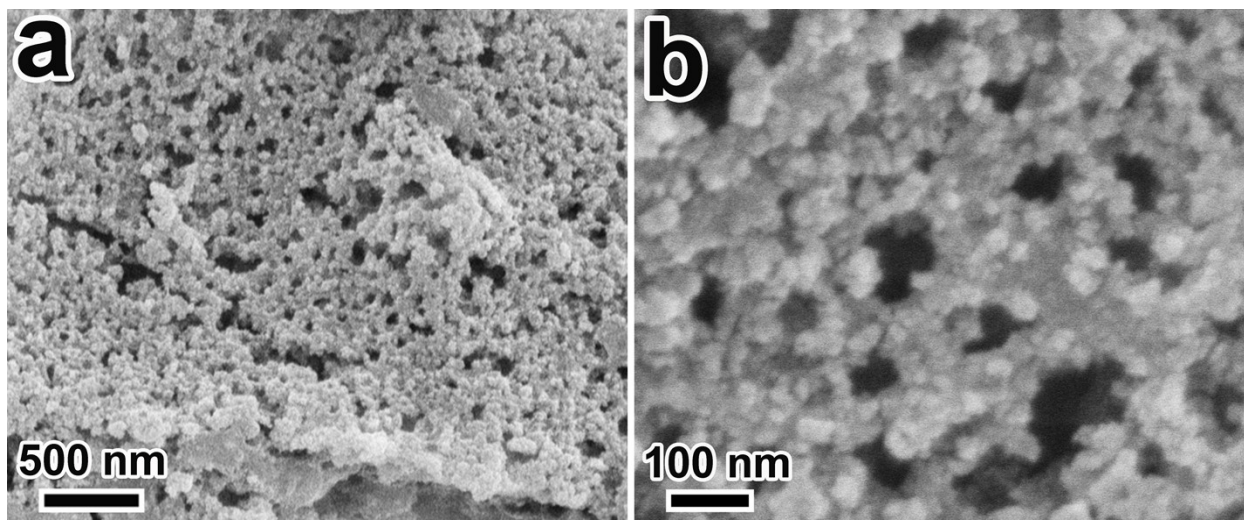

Fig. S5 SEM images of nanoporous Si-Co-C material.

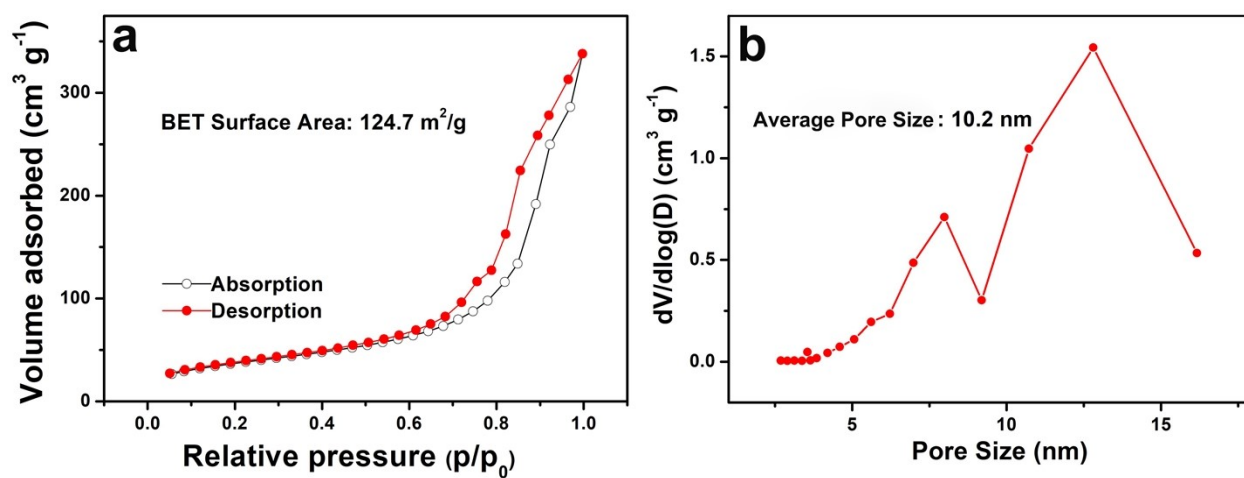

Fig. S6 Nitrogen adsorption/desorption isotherms (a) and pore size distribution (b) of the nanoporous Si-Co-C material.



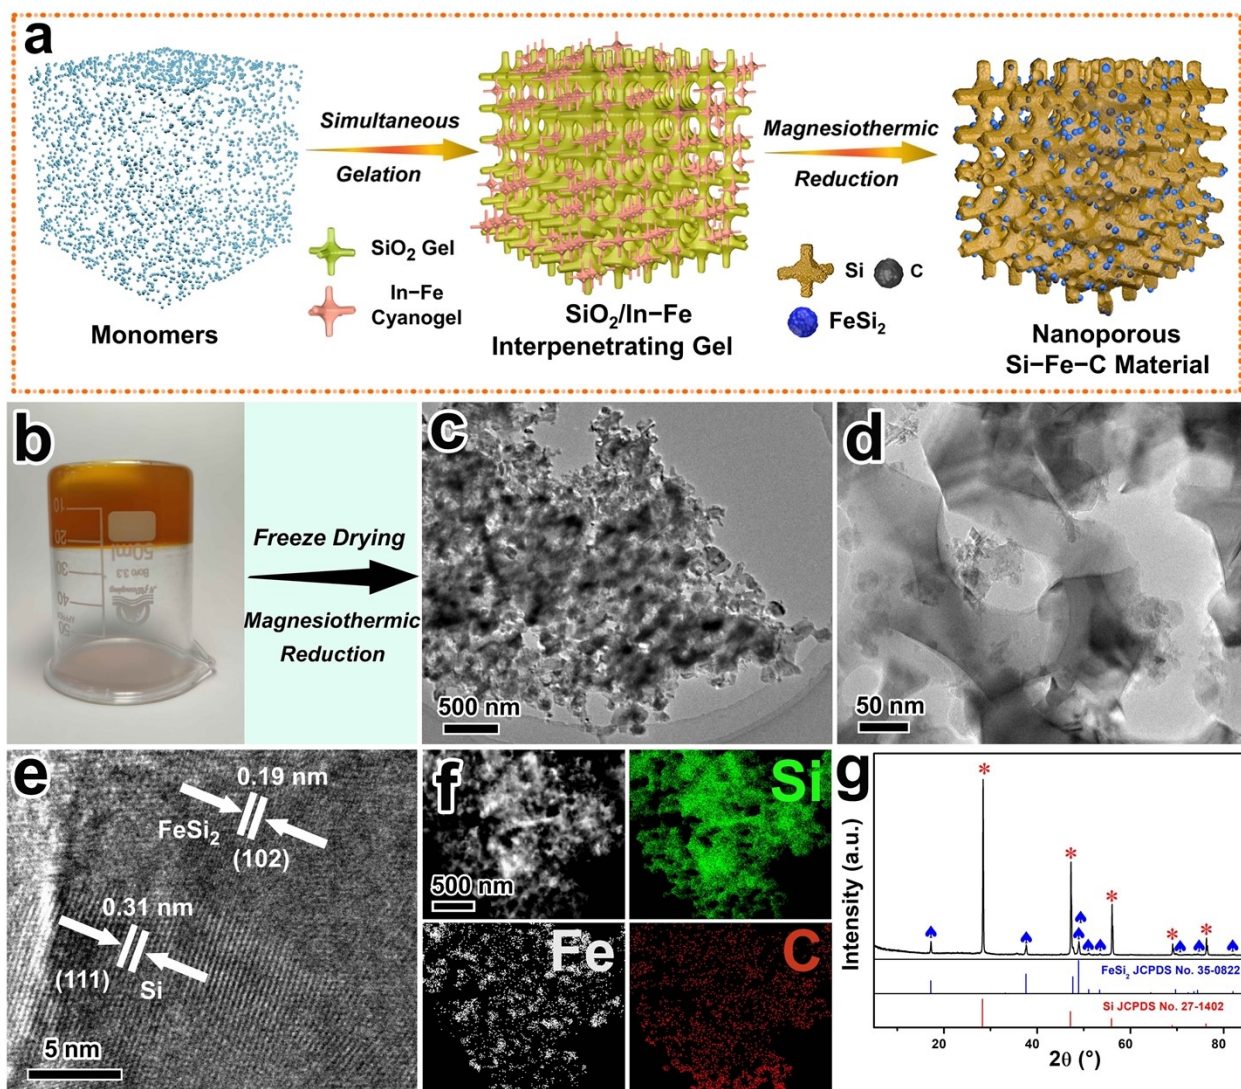

**Fig. S7** (b) Photograph of  $\text{SiO}_2/\text{In-Fe}$  interpenetrated hydrogel. (a) Synthetic diagram, (c, d) TEM images, (e) HRTEM image, (f) EDS elemental mappings, and (g) XRD pattern of the nanoporous Si-Fe-C material.

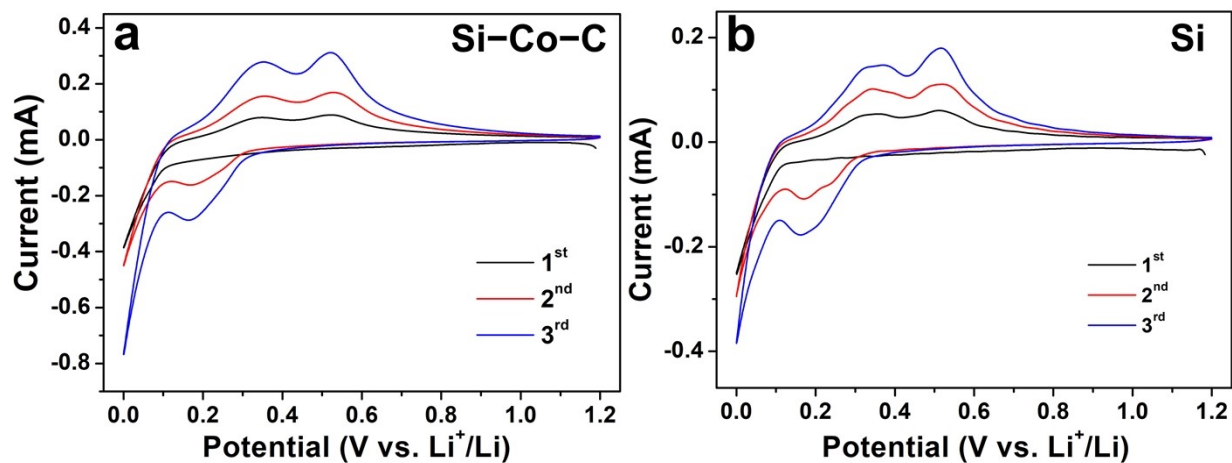

**Fig. S8** The initial three CV curves of the nanoporous Si-Co-C (a) and Si (b) anodes.

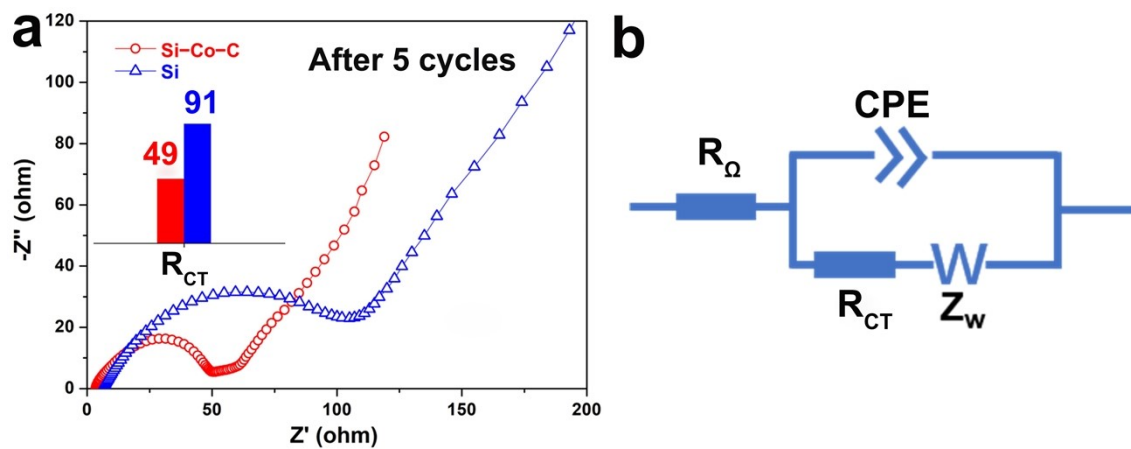

**Fig. S9** (a) Nyquist plots from impedance test of the Si-Co-C and Si anodes after 5 cycles. (b) The equivalent circuit model for the fitting of impedance plots.
